# Supplementary material for: Synergistic dual-layer passivation boosts efficiency and stability in perovskite solar cells using naphthol sulfonate
Source: Royal Society of Chemistry journal article supplement (doi:10.1039/d4mh01311e), 2024-10-23
Supplement: d4mh01311e1.pdf [file d4mh01311e1.pdf]

## Supporting Information

### Synergistic Dual-Layer Passivation Boosts Efficiency and Stability in Perovskite Solar Cells Using Naphthol Sulfonate

*Hao Liu,<sup>‡a</sup> Ning Jiang,<sup>‡a</sup> Jintao Wang,<sup>\*b</sup> Shuming Chen,<sup>c</sup> Jian Zhang<sup>\*a</sup> and Yu Duan<sup>\*a</sup>*

<sup>a</sup> College of Electronic Science and Engineering, Jilin University, Changchun 130012, China

<sup>b</sup> College of Information Engineering, Yantai Institute of Technology, Yantai 264005, China

<sup>c</sup> College of Physics, Changchun University of Science and Technology, Changchun 130012, China

E-mail: wangjintao@yitsd.edu.cn, zhangjian@jlu.edu.cn, [duanyu@jlu.edu.cn](mailto:duanyu@jlu.edu.cn)

<sup>‡</sup> Equal contributions.

## Experimental Section

### Materials

Dimethyl sulfoxide (DMSO), Dimethylformamide (DMF), Isopropanol (IPA), Methylammonium bromide (MABr), Methylammonium chloride (MACl), Forma-iminium iodide (FAI), Lead iodide ( $\text{PbI}_2$ ), Chlorobenzene (CB) and PTAA were purchased from Advanced Election Technology Co., Ltd. Dipotassium 7-hydroxynaphthalene-1,3-disulphonate (K-NDS) and Tris (pentafluoro phenyl) borane (TPFB) were obtained from TCI company. All materials in this study were used as received without further purification.

### Solutions Preparation

The  $\text{PbI}_2$  solution was obtained by dissolving 1.4 mM  $\text{PbI}_2$  into 1 mL DMF/DMSO mixed solvent (volume ratio is 94:6). The FAI/MABr/MACl solution was prepared by dissolving 70 mg FAI, 3 mg MABr and 11 mg MACl into 1 mL IPA. The solutions were stirring overnight before use. The HTL precursor solution was prepared by dissolving 40 mg PTAA with 4 mg TPFB in 1 mL CB. Mixing K-NDS with deionized water to obtain K-NDS solutions with different concentrations (2, 4, 6 mg/ml).

### Device fabrication

The ITO substrates were first ultrasonically washed by ethanol, acetone, and deionized water for 30 min followed by drying under nitrogen stream and treatment with UV-ozone for 30 min to remove any organic residues and enhance the surface hydrophilicity. Then, the  $\text{SnO}_2$  colloidal solution was diluted in deionized water (volume ratio is 1:6) and then spin-coated on ITO surface at the rate of 3000 rpm for 30 s, followed by annealing at 150 °C for 30 min. After cooling down to room temperature, another UV-ozone treatment was carried out for 30 min. The K-NDS solution with different concentrations (2, 4, 6 mg/ml) was spin-coated on the as-fabricated  $\text{SnO}_2$  film at the rate of 2000 rpm for 30 s, following by annealing at 100 °C for 10 min. After cooling down to room temperature, another UV-ozone treatment was carried out for 30 min, then transferred into a nitrogen glove box. The  $\text{PbI}_2$  solution was spin-coated on the  $\text{SnO}_2$ /K-NDS substrate at 1500 rpm for 30 s and annealed at 70 °C for 1 min. And the FAI/MABr/MACl solution was spin-coated on the substrate at 1800 rpm for 30 s, then the film was annealed outside the glove box at 150 °C for 10 min with 40% humidity, resulting in a  $(\text{FAPbI}_3)_x(\text{MAPbBr}_3)_{1-x}$  perovskite film ( $x$  is 0.92 in the precursor). The PTAA solution was spin-coated on the perovskite film as a hole conductor. The devices were completed by evaporation 100 nm silver in a vacuum chamber (base pressure,  $5 \times 10^{-4}$  Pa).

The perovskite bottom interface can be exposed using the following process:

1. Spin-coat a layer of UV-curable adhesive onto the perovskite film.
2. Cure the adhesive using an ultraviolet lamp.
3. Remove the cured adhesive layer.

### Characterization

The  $J$ - $V$  characteristics of the photovoltaic cells were measured under ambient conditions using a Keithley 2400 source meter, with simulated AM 1.5G solar illumination ( $100 \text{ mW/cm}^2$ ). Dark current and steady-state power output were also measured using the Keithley 2400. Electrochemical impedance spectroscopy (EIS) and capacitance-voltage ( $C$ - $V$ ) measurements were conducted using an IM6e Electrochemical Workstation (ZAHNER).

X-ray photoelectron spectroscopy (XPS) and ultraviolet photoelectron spectroscopy (UPS) were performed in an ultrahigh vacuum environment (base pressure of  $1 \times 10^{-10}$  mbar) using a Thermo Scientific Nexsa G2 system. XPS utilized a monochromatic Al  $K\alpha$  X-ray source (1486.6 eV), while UPS employed monochromatic He I $\alpha$  radiation (21.22 eV). The  $^1\text{H}$  NMR measurement in solution was carried out on the Bruker AVANCE III 400 (400 MHz)

spectrometer at room temperature. Deuterated DMSO was used as  $^1\text{H}$  NMR solvent to dissolve the K-NDS and  $\text{PbI}_2$  just before the  $^1\text{H}$  NMR measurement.

Atomic force microscopy (AFM) measurements were conducted using a Dimension Icon-PT (Bruker). Fourier-transform infrared (FTIR) spectroscopy of the  $\text{SnO}_2$  and perovskite films was performed in transmission mode using a Nicolet 6700 FTIR spectrometer (Thermo Fisher Scientific). UV-visible (UV-vis) spectra were recorded using a UV-3600 spectrophotometer (Hitachi). X-ray diffraction (XRD) patterns were acquired using a PANalytical X-ray diffractometer with  $\text{Cu K}\alpha$  radiation.

Surface and cross-sectional scanning electron microscopy (SEM) images were obtained using a Nova Nano 230 instrument. Steady-state and time-resolved photoluminescence (PL) measurements were carried out using an FS5 spectrometer (Edinburgh Instruments). Water contact angle measurements were performed using a Krüss DSA100s drop shape analyzer.

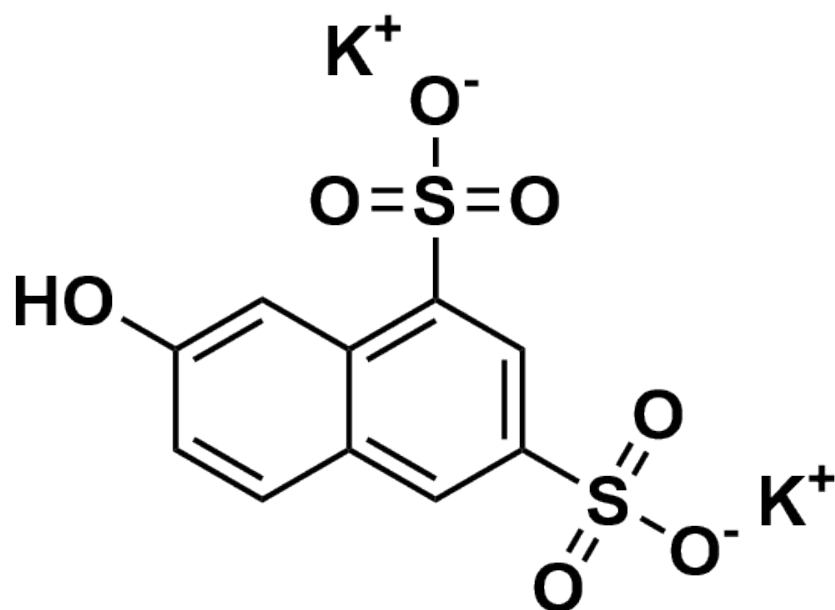

**Figure S1.** The structure of the K-NDS.

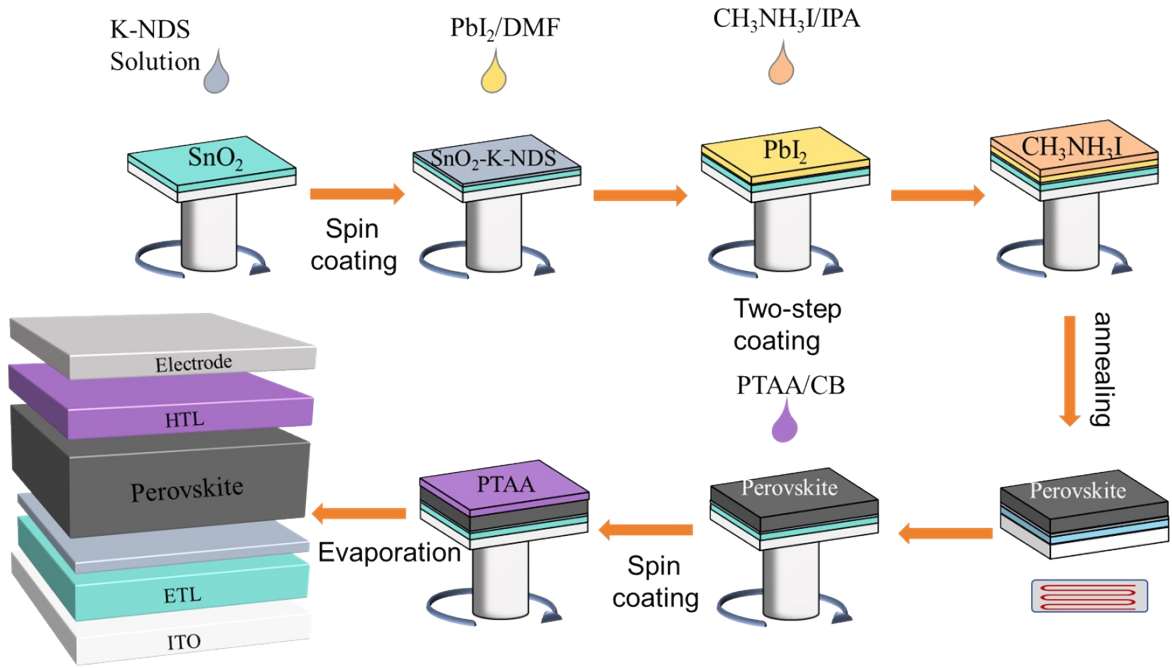

**Figure S2.** The fabrication of the PSCs.

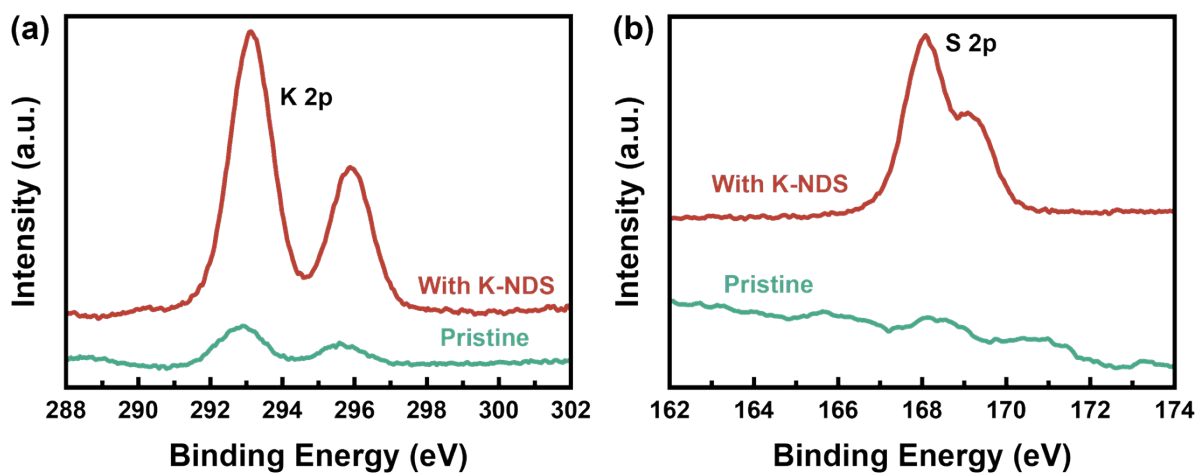

**Figure S3.** XPS high-resolution spectra of SnO<sub>2</sub> and SnO<sub>2</sub>/K-NDS for (a) K 2p, (c) S 2p.

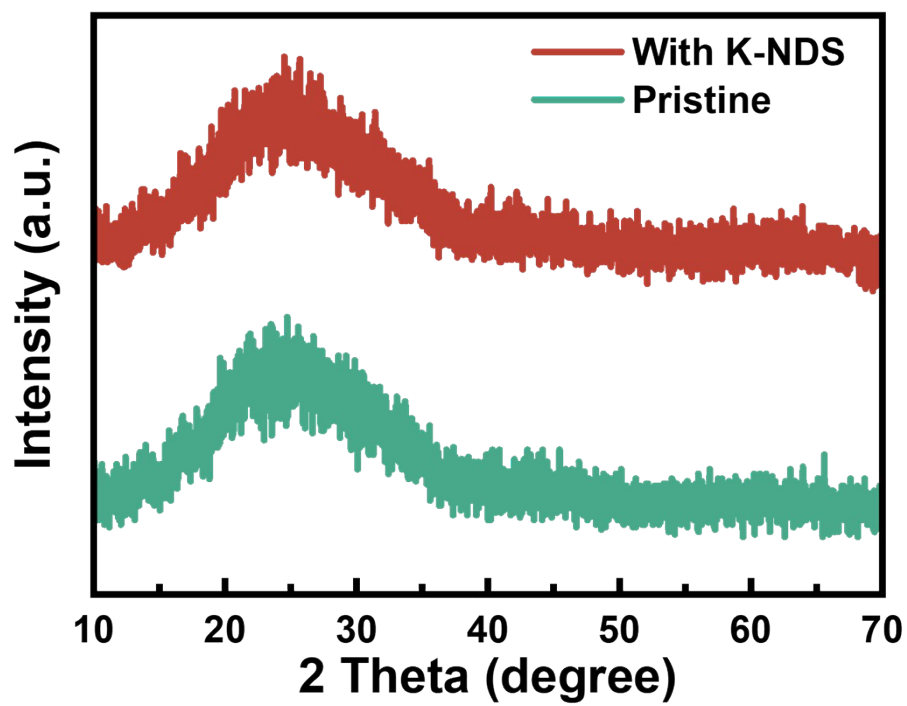

**Figure S4.** The XRD spectrum of SnO<sub>2</sub> and SnO<sub>2</sub>/K-NDS.

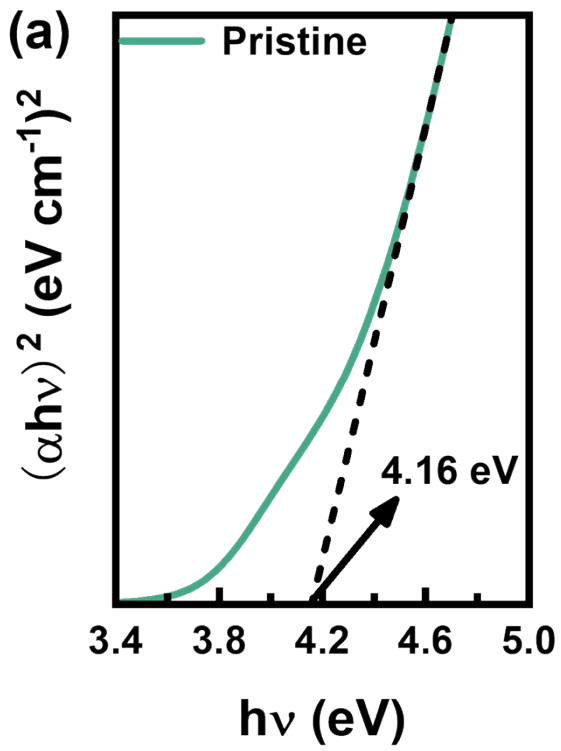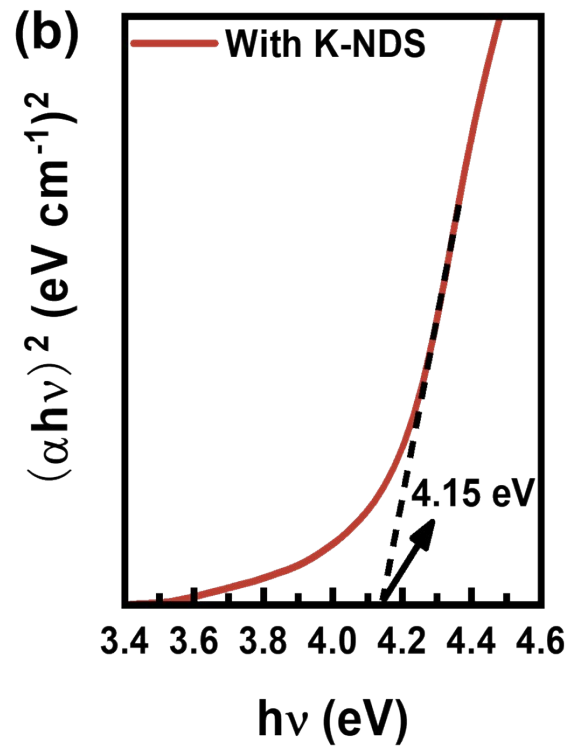

Figure S5. The Tauc plot of the SnO<sub>2</sub> and SnO<sub>2</sub>/K-NDS.



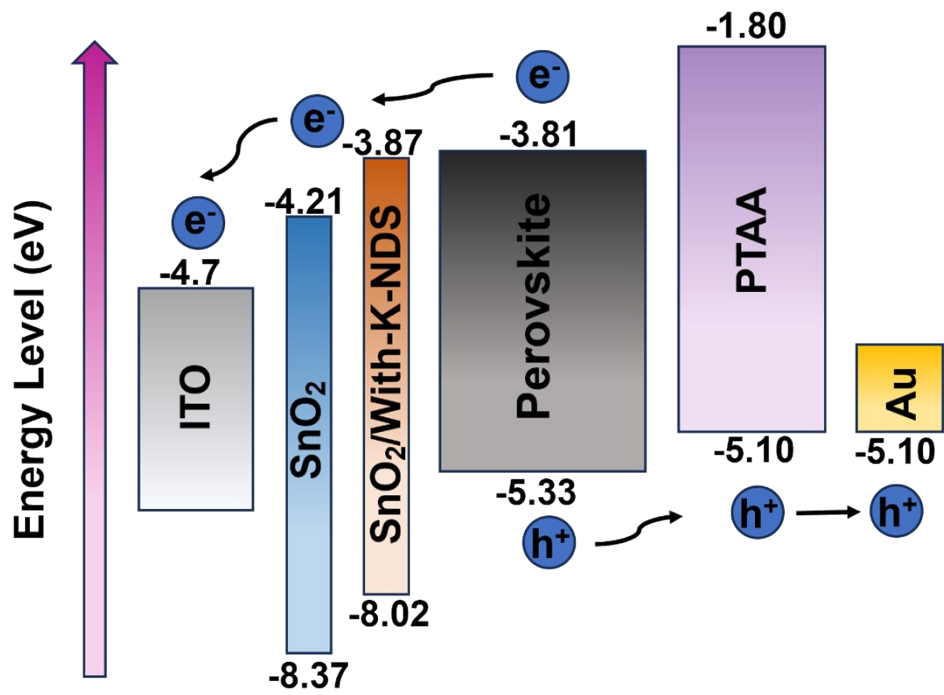

**Figure S6.** The Schematic illustration of energy level diagram in the PSCs.

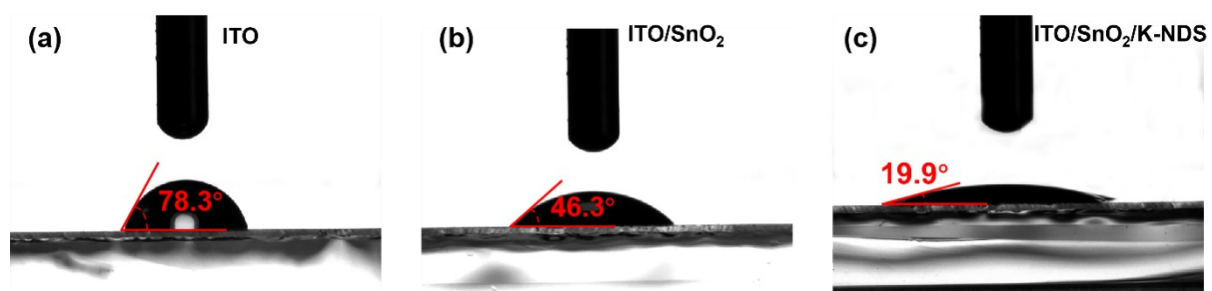

**Figure S7.** The contact angle measurements of (a) ITO, (b) ITO/SnO<sub>2</sub> and (c) ITO/SnO<sub>2</sub>/K-NDS films.

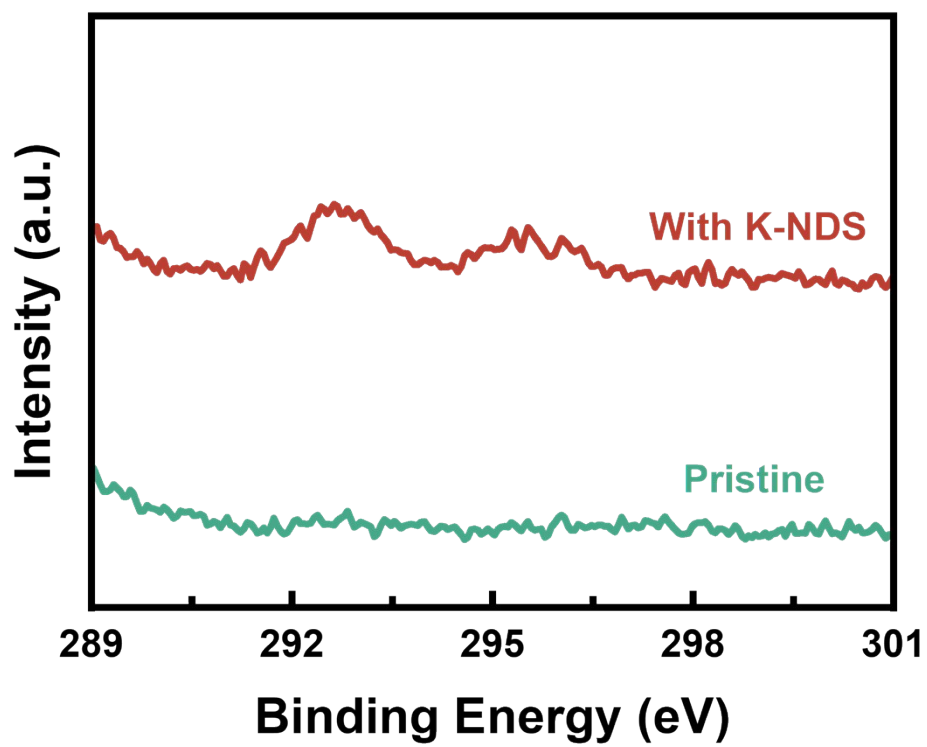

**Figure S8.** XPS high-resolution spectra of Perovskite and K-NDS/ Perovskite for K 2p.

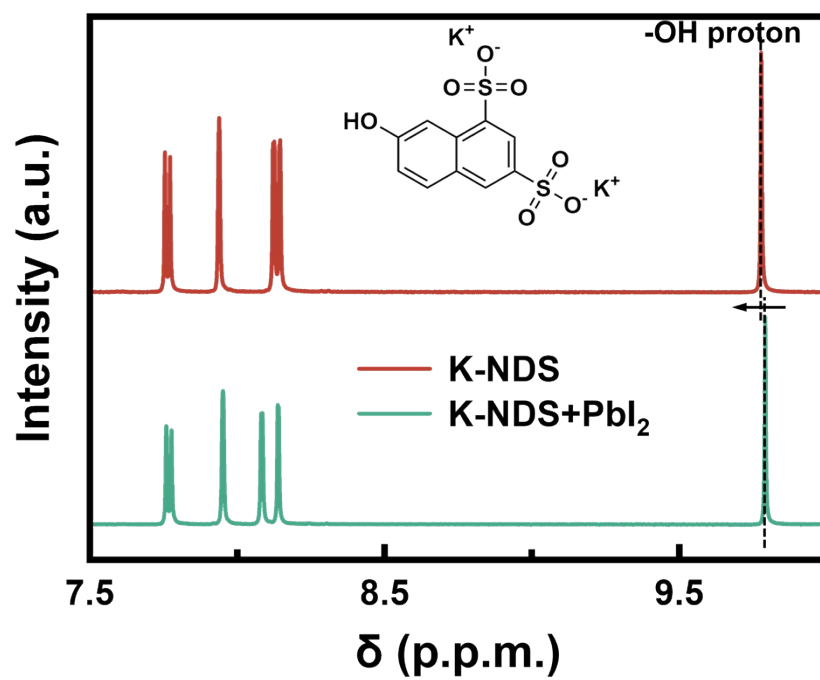

**Figure S9.** <sup>1</sup>H NMR spectra of K-NDS and its mixture with PbI<sub>2</sub> in deuterated DMSO solution.

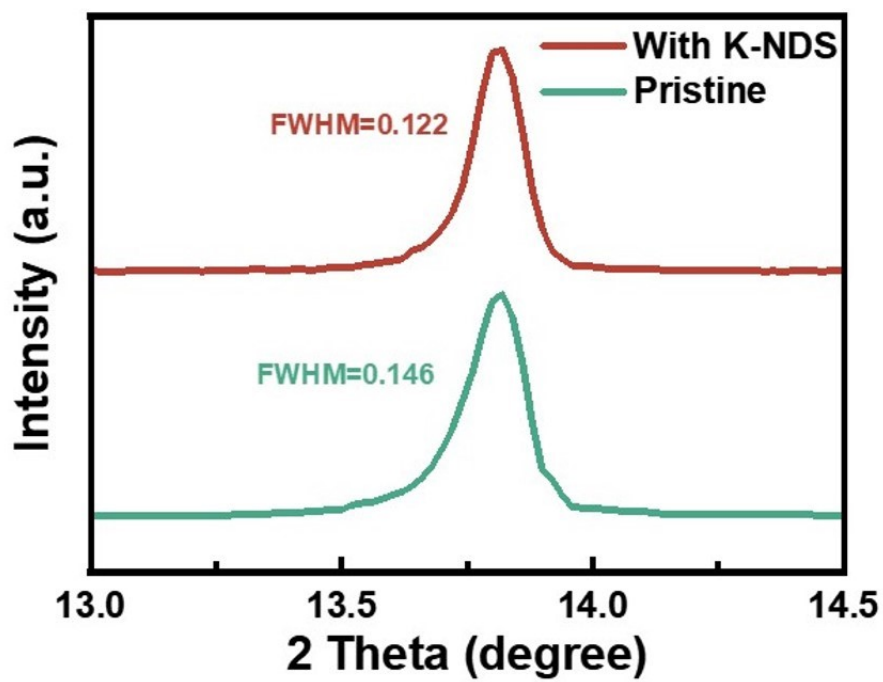

**Figure S10.** The FTHM of (100) crystallographic plane for perovskite and K-NDS/perovskite.

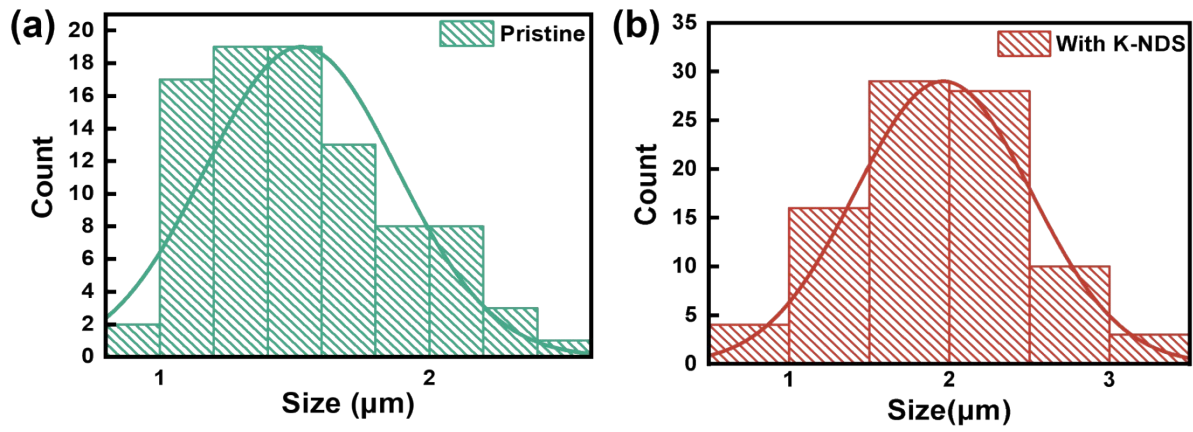

Figure S11. Statistical histogram of grain size of perovskite and K-NDS/perovskite.

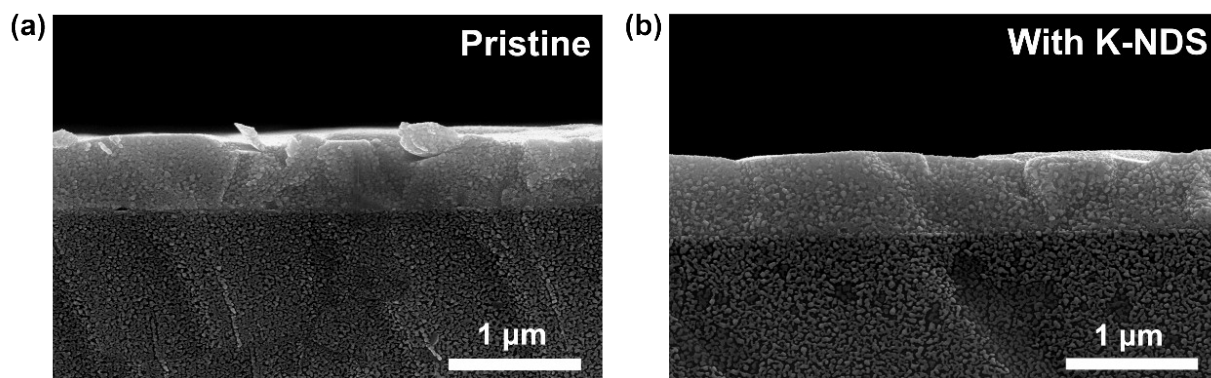

**Figure S12.** The cross-sectional SEM images of the perovskite on (a) SnO<sub>2</sub> and (b) SnO<sub>2</sub>/K-NDS.

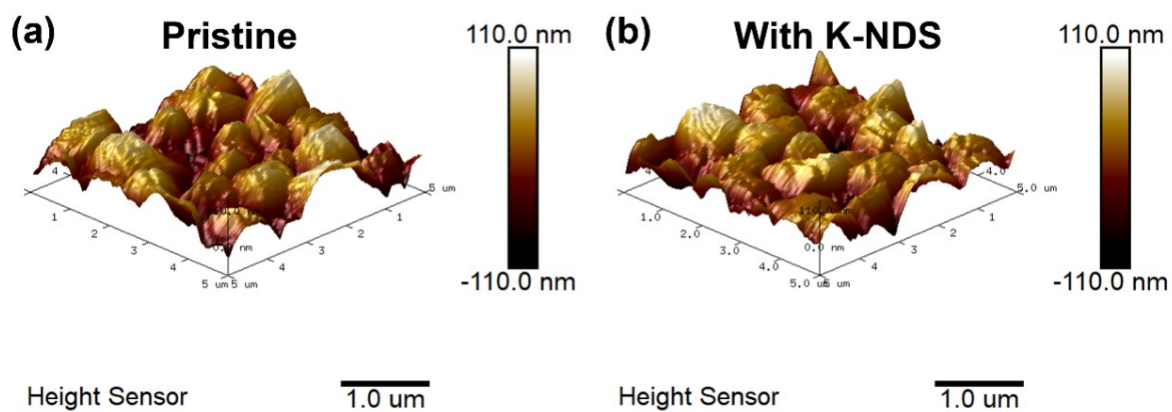

**Figure S13.** The 3D-AFM images of the perovskite on (a) SnO<sub>2</sub> and (B) SnO<sub>2</sub>/K-NDS substrate.



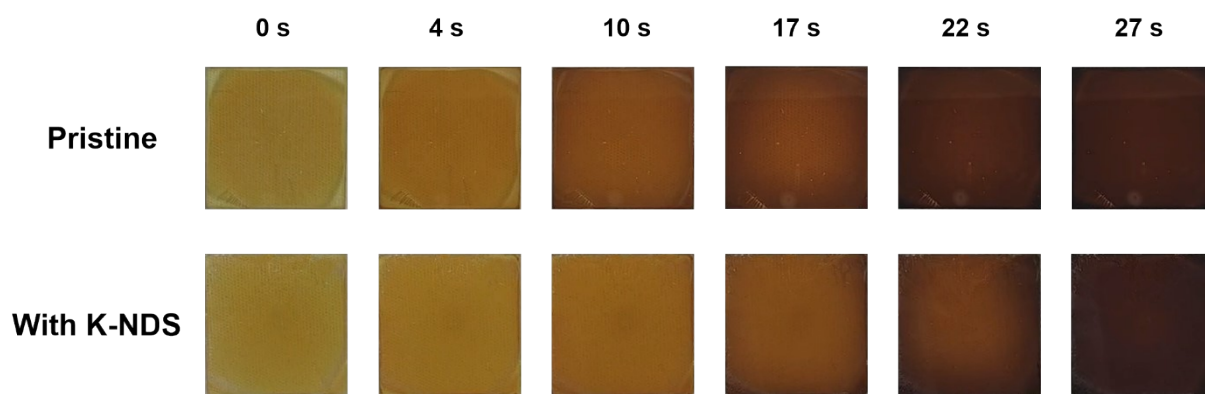

**Figure S14.** The annealing images of perovskite films deposited in SnO<sub>2</sub> and SnO<sub>2</sub>/K-NDS.

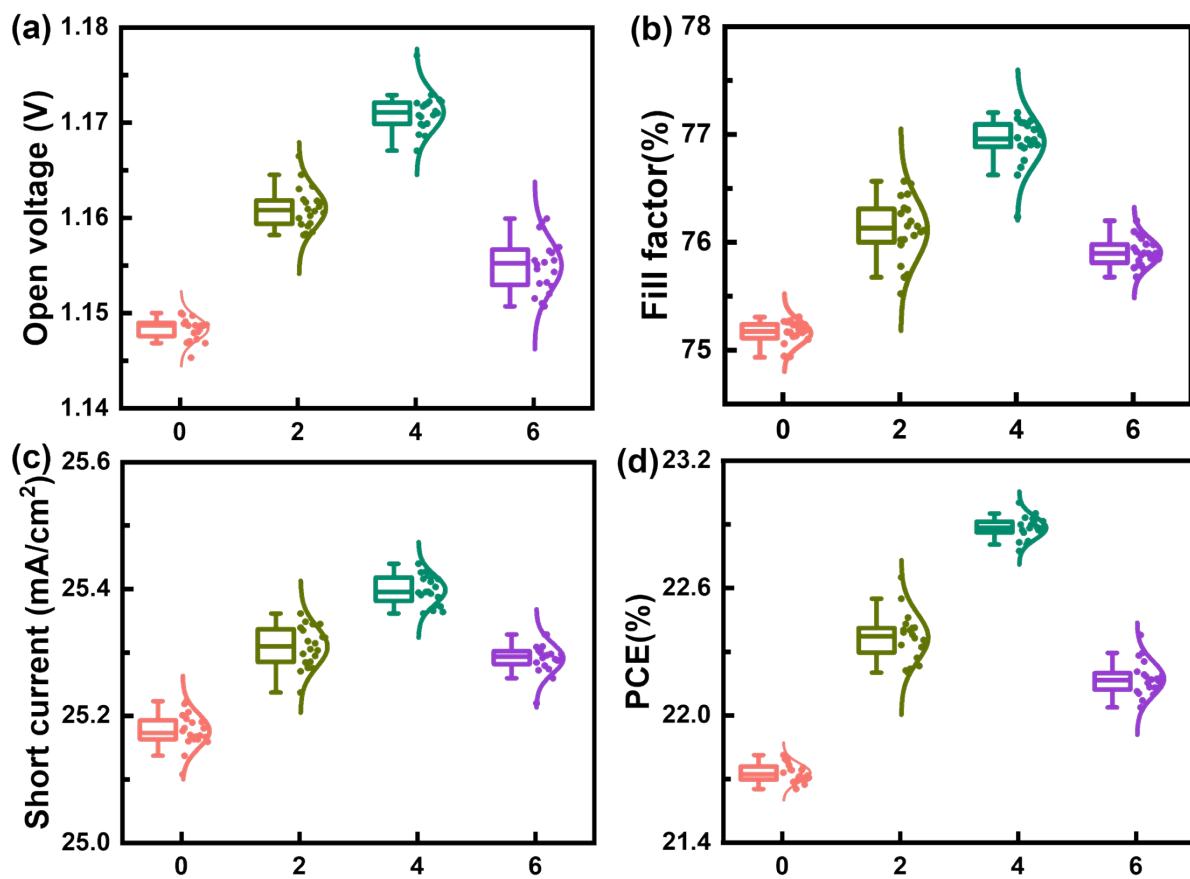

**Figure S15.** The statistics parameters distribution of PCSs devices (a)  $V_{OC}$ , (b) FF, (c)  $J_{SC}$  and (d) PCE.

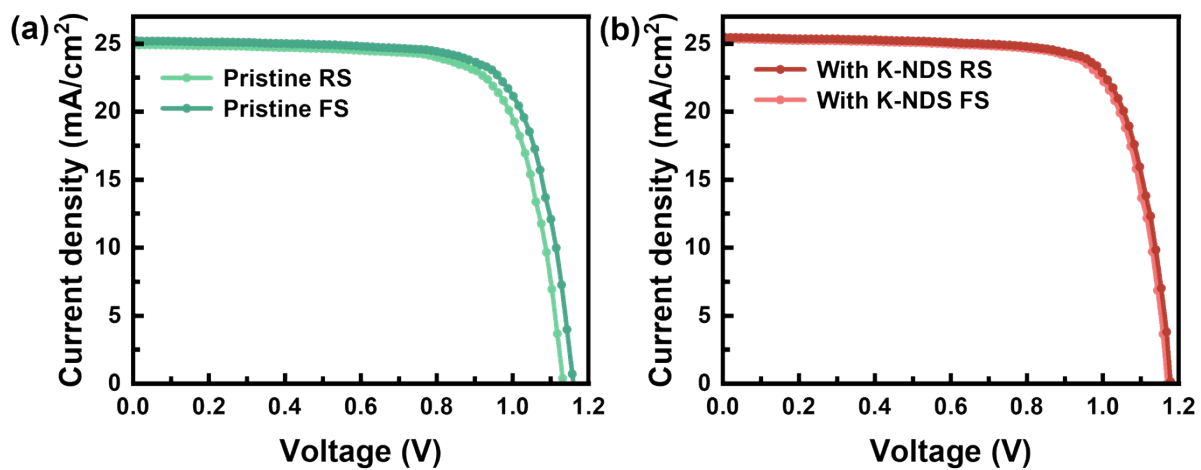

**Figure S16.** The RS and FS  $J$ - $V$  curves of PSCs devices deposited on (a) SnO<sub>2</sub> and (b) SnO<sub>2</sub>/K-NDS ETL.

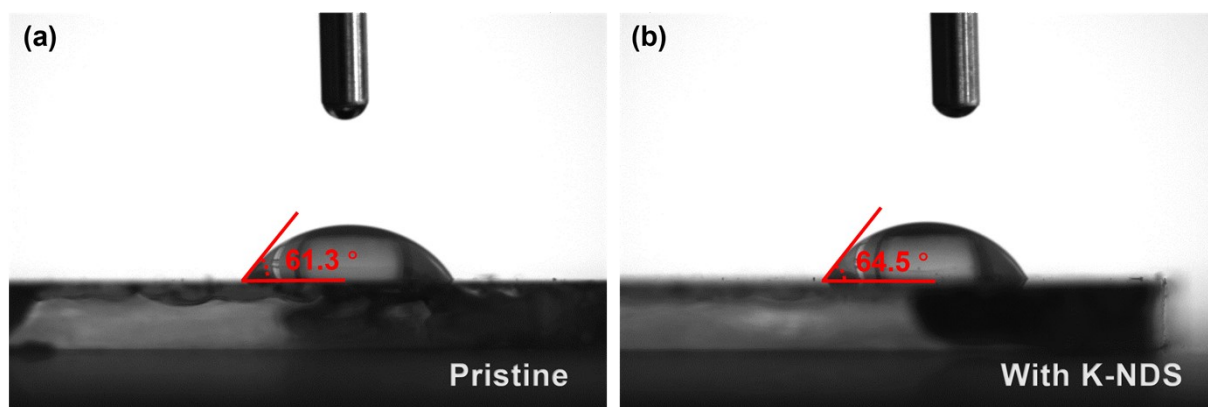

**Figure S17.** The contact angle measurements of perovskite film deposited on (a) SnO<sub>2</sub> and (b) SnO<sub>2</sub>/K-NDS.

**Table S1.** O content of the surface of SnO<sub>2</sub> and SnO<sub>2</sub>/K-NDS of O 1s high resolution spectra.

| Peak                             | Atomic conc (%) |            |
|----------------------------------|-----------------|------------|
|                                  | Pristine        | With K-NDS |
| Sn-O                             | 66.01           | 93.56      |
| O <sub>V</sub> / O <sub>OH</sub> | 33.99           | 2.40       |
| SO <sub>3</sub> <sup>-</sup>     | 0               | 4.04       |

**Table S2.** The calculation of the energy alignment.

| Sample     | $E_{SEC}$<br>(eV) | $E_{VBE}$<br>(eV) | $E_F$<br>(eV) | $E_g$<br>(eV) | $VBM$<br>(eV) | $CBM$<br>(eV) |
|------------|-------------------|-------------------|---------------|---------------|---------------|---------------|
| Pristine   | 16.93             | 4.08              | -4.29         | 4.16          | -8.37         | -4.21         |
| With K-NDS | 17.07             | 3.87              | -4.15         | 4.15          | -8.02         | -3.87         |

**Table S3.** The parameters of TRPL measurement.

| Device     | $\tau_1$<br>(ns) | $A_1$<br>(%) | $\tau_2$<br>(ns) | $A_2$<br>(%) | $\tau_{ave}$<br>(ns) |
|------------|------------------|--------------|------------------|--------------|----------------------|
| Pristine   | 28.61            | 16.27        | 209.00           | 65.50        | 203.07               |
| With K-NDS | 36.57            | 21.69        | 191.33           | 59.61        | 181.27               |

**Table S4.** The calculated parameters and trap density ( $N_t$ ) of perovskite films based on SnO<sub>2</sub> and SnO<sub>2</sub>/K-NDS.

| Device     | $L$<br>(nm) | $V_{TFL}$<br>(V) | $N_t$<br>(cm <sup>-3</sup> ) |
|------------|-------------|------------------|------------------------------|
| Pristine   | 547.96      | 0.26             | 3.063×10 <sup>15</sup>       |
| With K-NDS | 550.10      | 0.14             | 1.636×10 <sup>15</sup>       |

**Table S5.** Performance summary the champion PSCs devices with various K-NDS coccentration.

| Device  | $J_{sc}$<br>(mA/cm <sup>2</sup> ) | $V_{oc}$<br>(V) | FF<br>(%) | PCE<br>(%) |
|---------|-----------------------------------|-----------------|-----------|------------|
| 0 mg/ml | 25.20                             | 1.150           | 75.27     | 21.81      |
| 2 mg/ml | 25.36                             | 1.166           | 76.56     | 22.64      |
| 4 mg/ml | 25.44                             | 1.172           | 77.15     | 23.00      |
| 6 mg/ml | 25.30                             | 1.160           | 75.98     | 22.29      |

**Table S6.** Performance summary the PSCs devices with and without K-NDS modification.

| Device     |    | $J_{sc}$<br>(mA/cm <sup>2</sup> ) | $V_{oc}$<br>(V) | FF<br>(%) | PCE<br>(%) | HI     |
|------------|----|-----------------------------------|-----------------|-----------|------------|--------|
| Pristine   | RS | 25.20                             | 1.150           | 75.27     | 21.81      | 0.0422 |
|            | FS | 24.92                             | 1.130           | 74.20     | 20.89      |        |
| With K-NDS | RS | 25.44                             | 1.172           | 77.15     | 23.00      | 0.0217 |
|            | FS | 25.32                             | 1.166           | 76.23     | 22.50      |        |
